# Supplementary material for: 3D fractures analysis and conservation assessment of wrought iron javelin through advanced non-invasive techniques
Source: PubMed Central journal article supplement (PMC10287633; doi:10.1038/s41598-023-37179-w), 2023-06-22
Supplement: 41598_2023_37179_MOESM2_ESM.pdf [file 41598_2023_37179_MOESM2_ESM.pdf]

# 3D fractures analysis and conservation assessment of wrought iron javelin through advanced non-invasive techniques

Martina Bernabale<sup>1</sup>, Flavio Cognigni<sup>2</sup>, Chiara Mancini<sup>2</sup>, Anacleto Proietti<sup>2</sup>, Francesco Mura<sup>2</sup>,  
Daria Montanari<sup>3</sup>, Lorenzo Nigro<sup>3</sup>, Marco Rossi<sup>2</sup> and Caterina De Vito<sup>1</sup>

## **Supplementary movie legend:**

**Movie S1:** 3D graph of fractures to investigate their spatial arrangement with respect to uncorroded metal particles.
